# Supplementary material for: Computational study of the interaction of the psychoactive amphetamine with 1,2-indanedione and 1,8-diazafluoren-9-one as fingerprinting reagents
Source: Royal Society of Chemistry journal article supplement (doi:10.1039/d2ra07044h), 2023-01-01
Supplement: d2ra07044h1.pdf [file d2ra07044h1.pdf]

## Supplementary Information

**Computational study of the interaction of the psychoactive amphetamine with 1,2-indanedione and 1,8-diazafluoren-9-one as fingerprinting reagents**

**D. Bhikharee<sup>1</sup>, L. Rhyman<sup>1,2</sup> and P. Ramasami<sup>1,2\*</sup>**

<sup>1</sup>*Computational Chemistry Group, Department of Chemistry, Faculty of Science, University of Mauritius, Réduit 80837, Mauritius*

<sup>2</sup>*Department of Chemistry, University of South Africa, Private Bag X6, Florida, 1710, South Africa*

\*Author for correspondence email: [p.ramasami@uom.ac.mu](mailto:p.ramasami@uom.ac.mu)

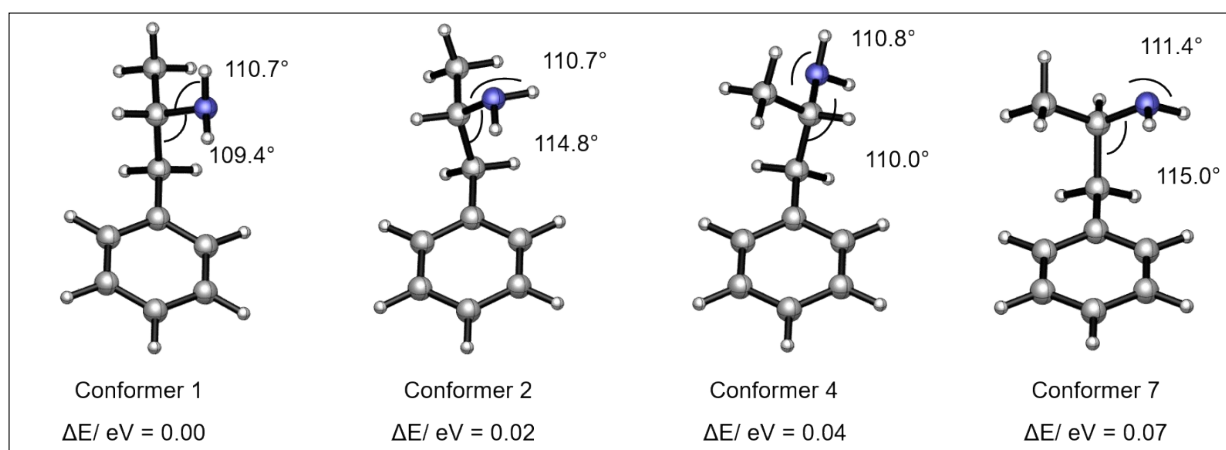

**Fig. S1** AMP conformers

**Table S1** Interaction angles as indicated by the orange curves in Fig. 3

| Structure   | Angle between | Angle |
|-------------|---------------|-------|
| AMP-IND     | C-O1...H2     | 69.5  |
|             | C-O2...H1     | 72.9  |
| AMP-DFO     | C-N...H1      | 115.9 |
|             | C-O...H2      | 107.5 |
| ALA-IND     | C-H2...O3     | 96.0  |
|             | C-O2...H1     | 98.9  |
|             | C-O1...H1     | 86.1  |
| ALA-DFO     | C-O2...H3     | 117.5 |
|             | C-N...H2      | 123.7 |
|             | C-H1...O1     | 135.8 |
| AMP-ALA     | C-H3...O      | 153.1 |
|             | C-H2...O      | 144.0 |
|             | C-N...H1      | 110.4 |
| AMP-ALA-IND | C-H6...O4     | 161.6 |
|             | C-H5...O4     | 134.5 |
|             | C-N...H3      | 110.3 |
|             | C-H4...O3     | 95.9  |
|             | C-O2...H2     | 94.3  |
|             | C-O1...H2     | 99.2  |
| AMP-ALA-DFO | C-O1...H1     | 127.9 |
|             | C-N2...H3     | 78.5  |
|             | C-O1...H2     | 108.5 |
|             | C-N1...H2     | 91.5  |
|             | C-N1...H1     | 134.1 |
|             | C-H6...O2     | 151.3 |
|             | C-H5...O2     | 144.6 |
| C-N3...H4   | 111.4         |       |

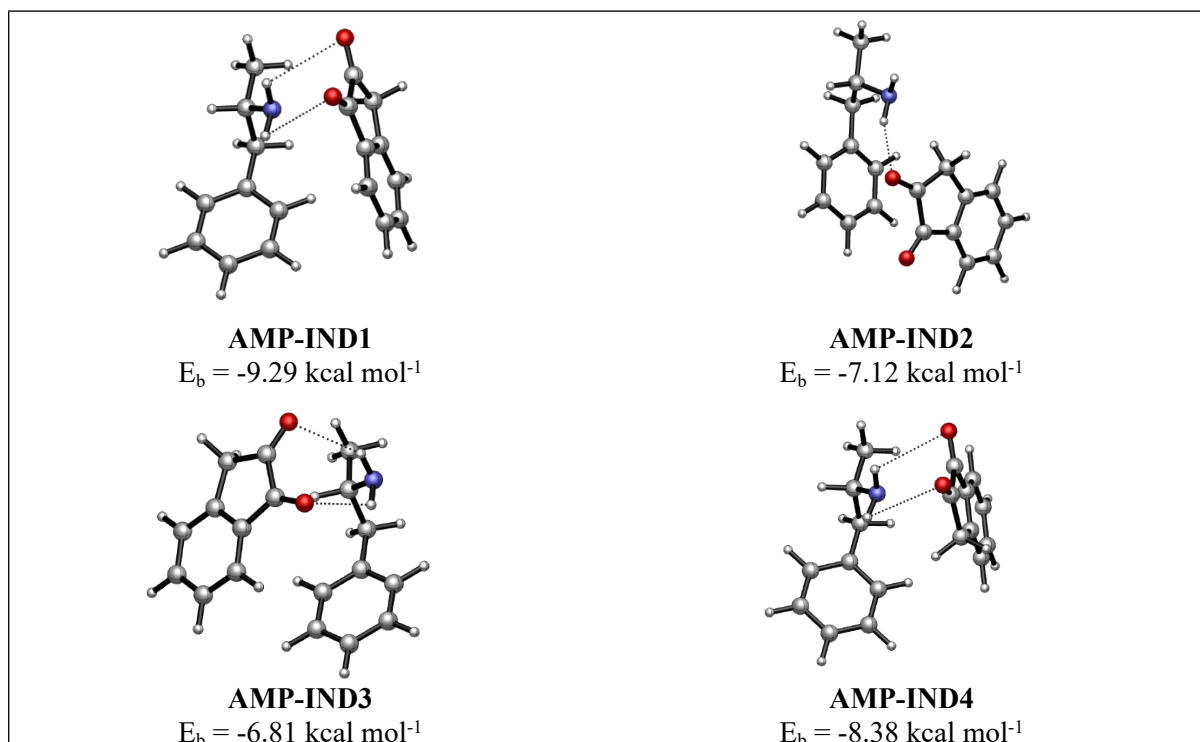

**Fig. S2** Optimised geometries of AMP binding with IND

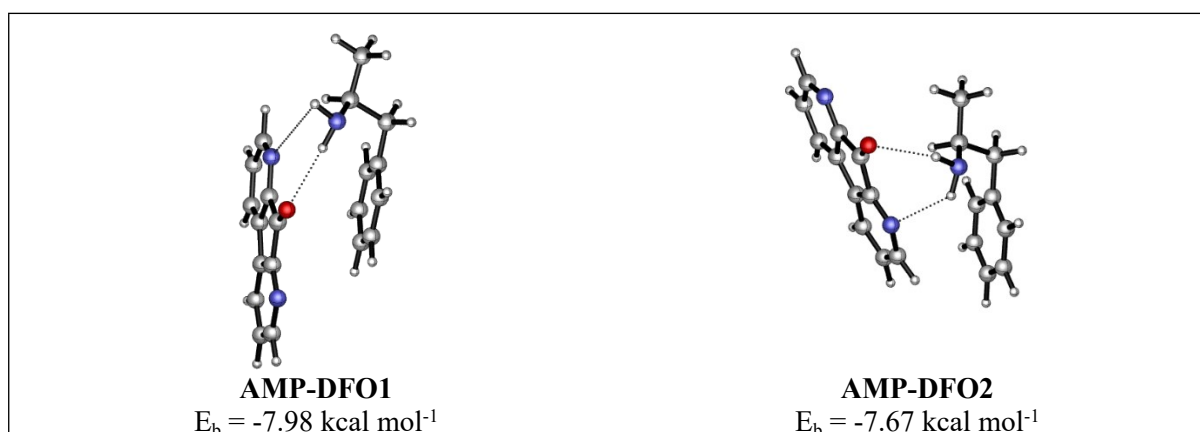

**Fig. S3** Optimised geometries of AMP binding with DFO

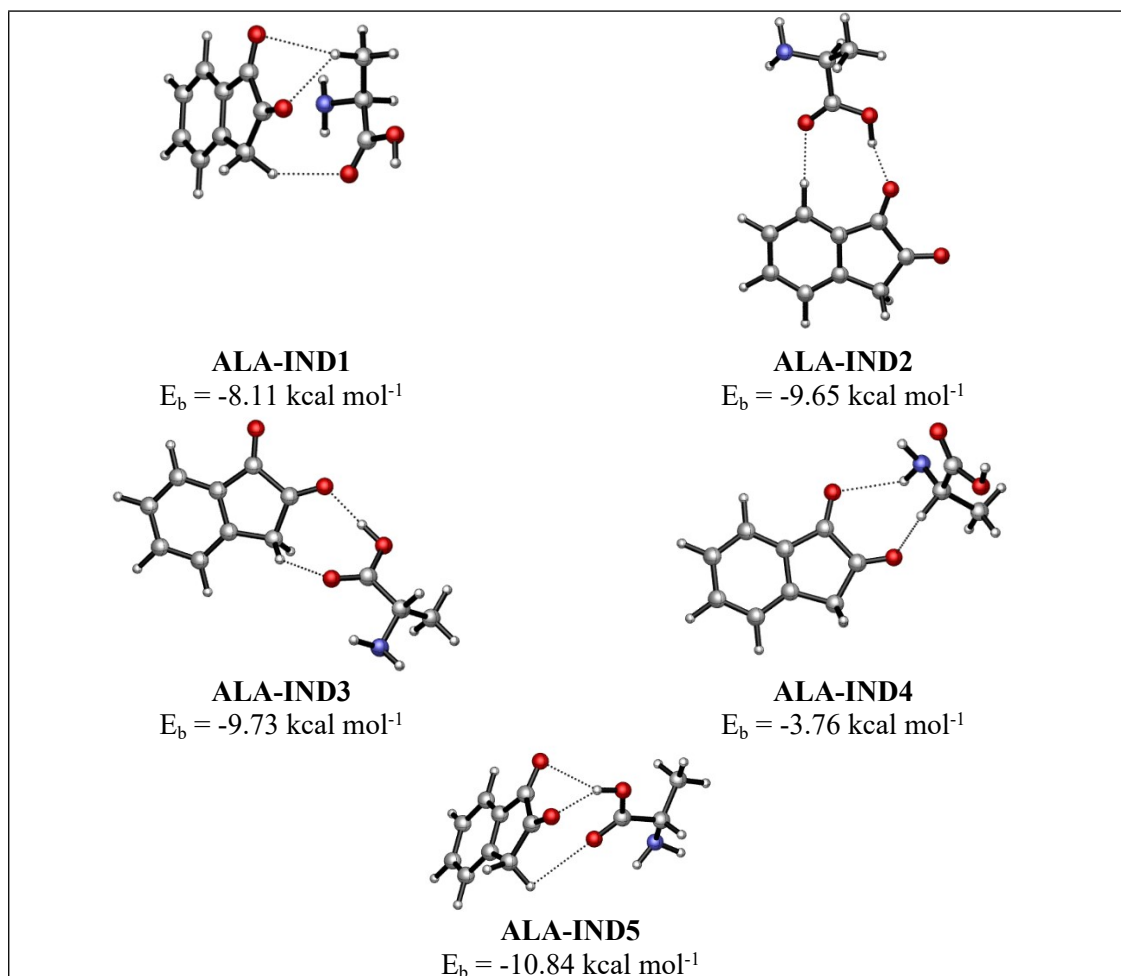

**Fig. S4** Optimised geometries of ALA binding with IND

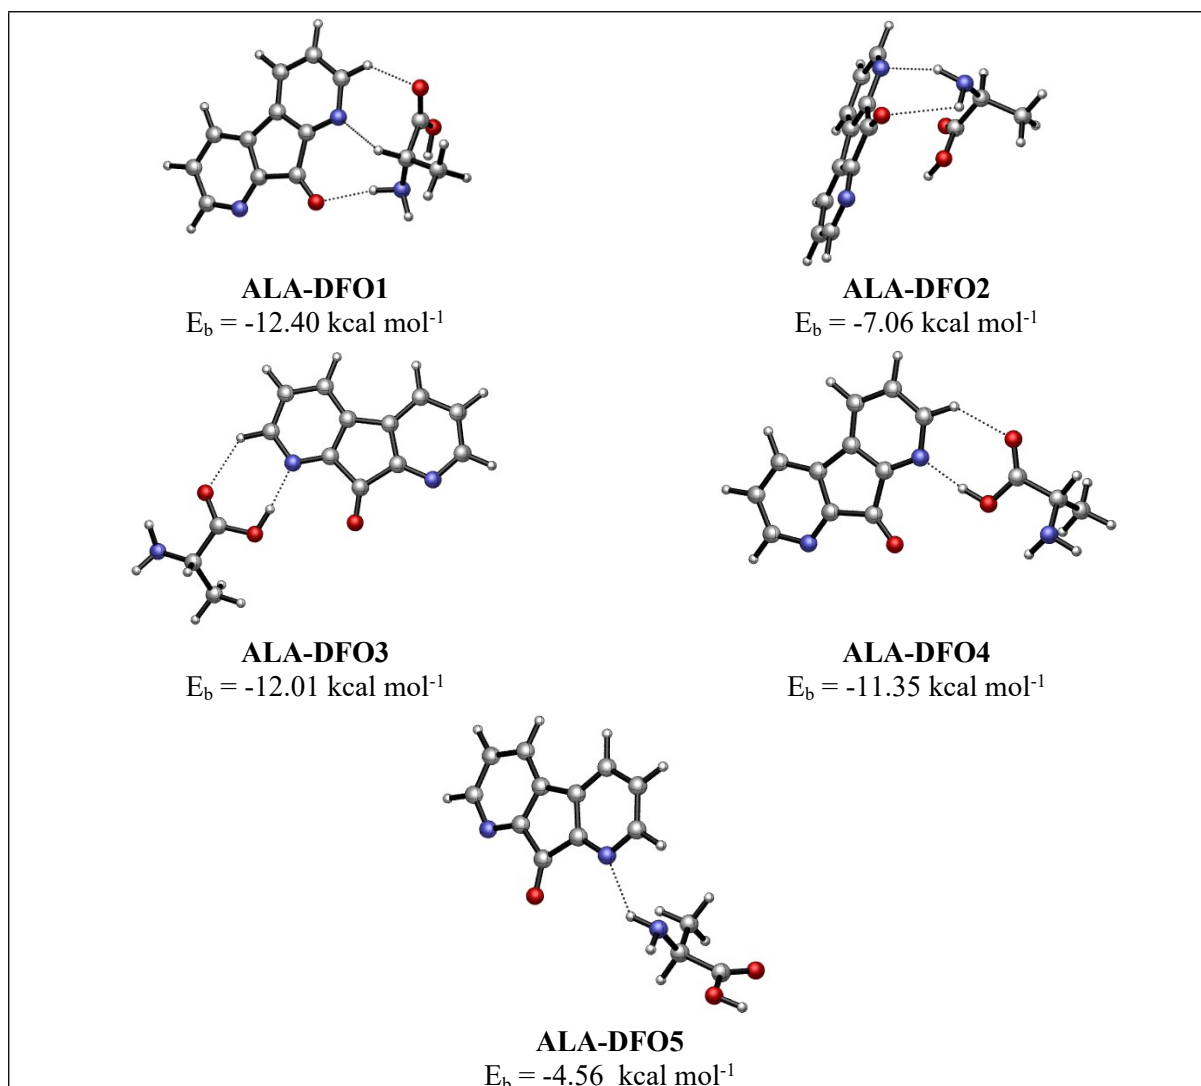

**Fig. S5** Optimised geometries of ALA binding with DFO

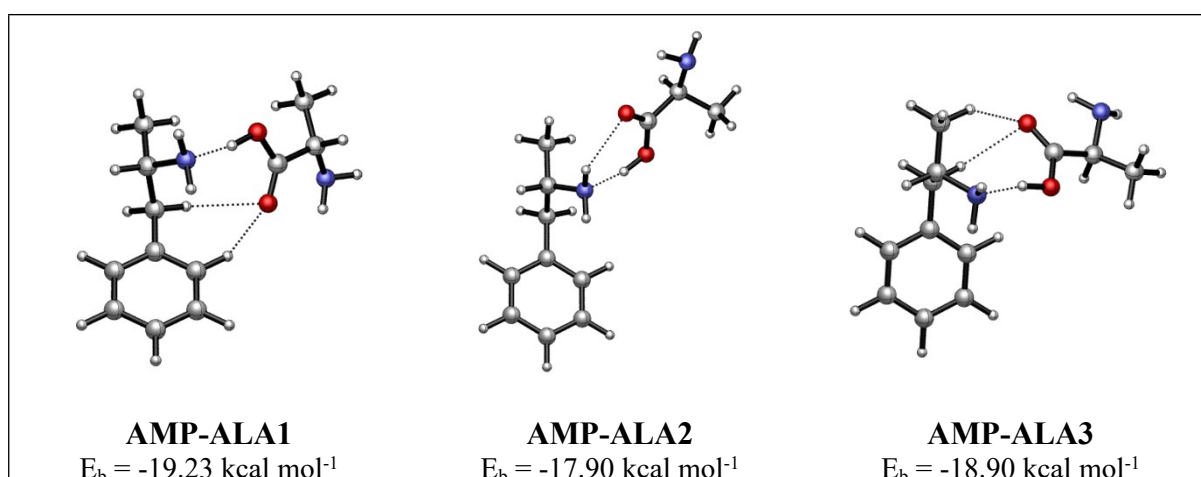

**Fig. S6** AMP binding with ALA

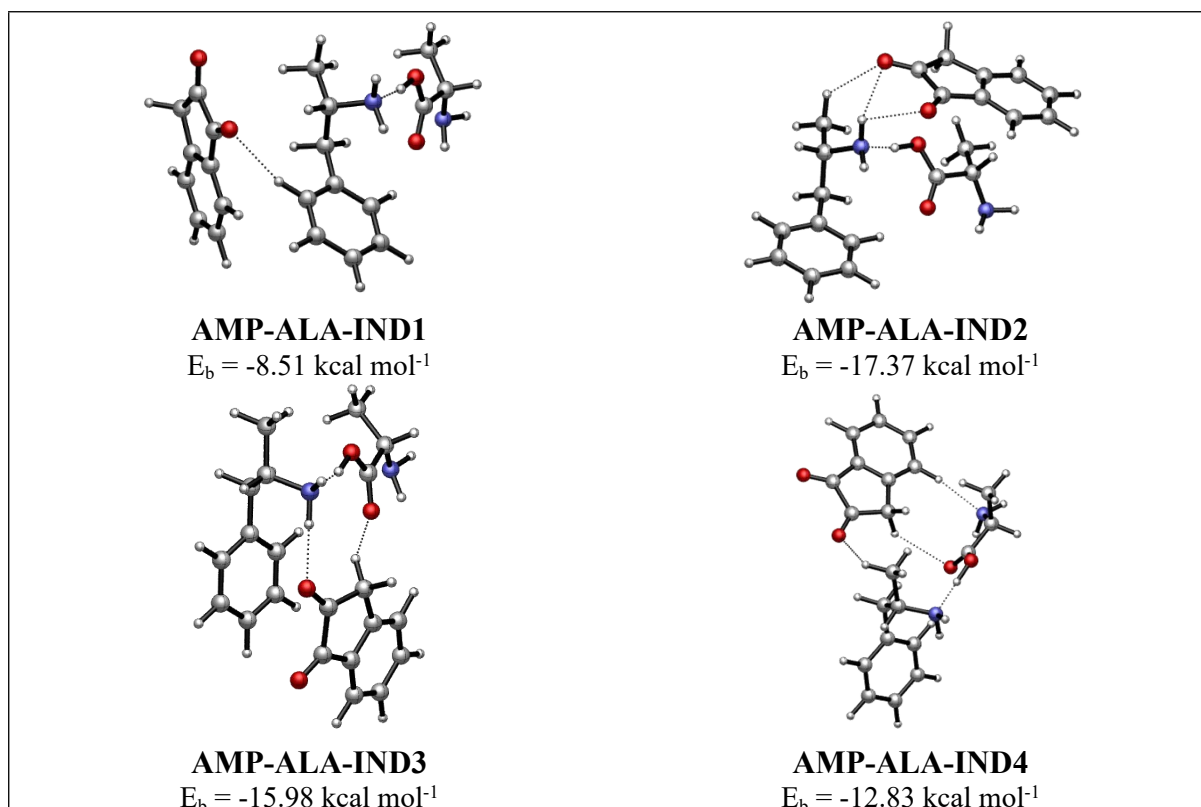

**Fig. S7** Optimised geometries of AMP-ALA binding with IND

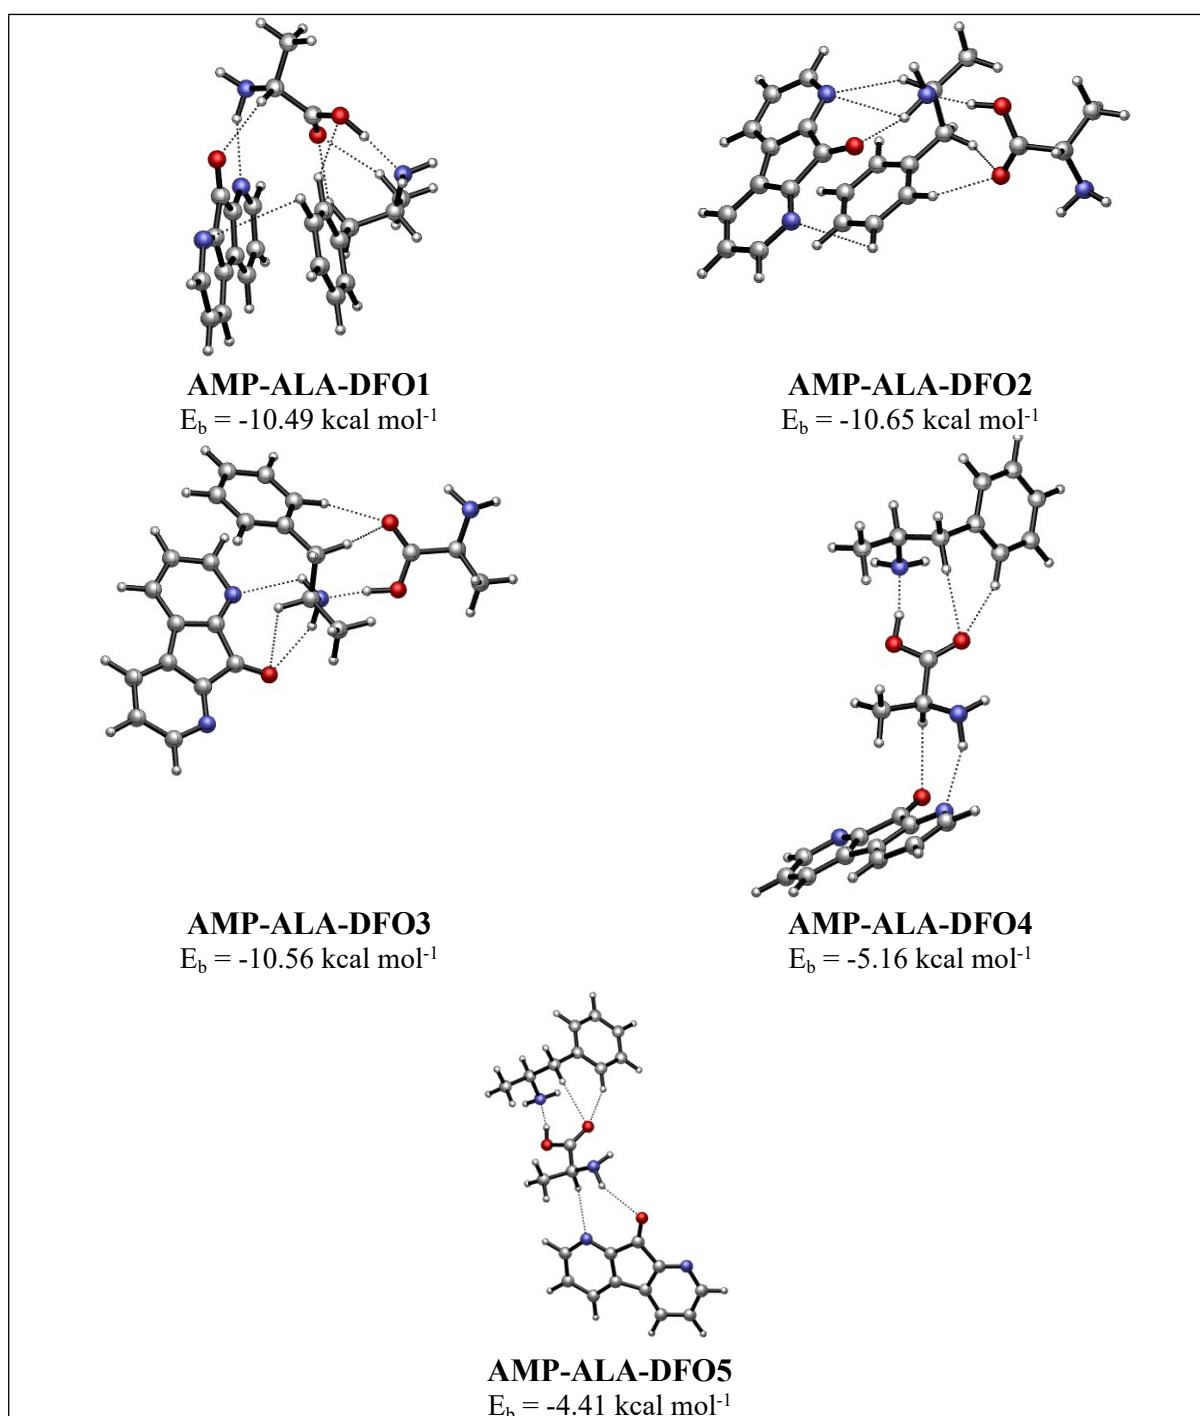

**Fig. S8** Optimised geometries of AMP-ALA binding with DFO

**Table S2** Uncorrected energies, ZPE and the BSSE corrections of the binding structures

| Structure       | Energy/<br>Hartree | ZPE       | BSSE<br>corrections | Total Gibbs<br>energy/<br>Hartree | Total Enthalpy/<br>Hartree |
|-----------------|--------------------|-----------|---------------------|-----------------------------------|----------------------------|
| AMP             | -405.5789852       | 0.203355  |                     | -405.4107857                      | -405.3650843               |
| IND             | -497.0278038       | 0.126506  |                     | -496.9358055                      | -496.8917535               |
| DFO             | -607.5196195       | 0.145809  |                     | -607.408872                       | -607.363528                |
| ALA             | -323.7626074       | 0.107742  |                     | -323.696751                       | -323.6583515               |
| AMP-IND         | -902.6299496       | 0.331688  | 0.006536312         | -902.3473677                      | -902.2779451               |
| AMP-DFO         | -1013.119958       | 0.350379  | 0.007421628         | -1012.820813                      | -1012.747751               |
| ALA-IND         | -820.8136364       | 0.2362315 | 0.003970789         | -820.6239913                      | -820.5598598               |
| ALA-DFO         | -931.3104424       | 0.2564831 | 0.005523108         | -931.1021691                      | -931.0354064               |
| AMP-ALA         | -729.3751204       | 0.3139828 | 0.006835885         | -729.1086316                      | -729.0426602               |
| AMP-ALA-<br>IND | -1226.431255       | 0.4411407 | 0.007990962         | -1226.050716                      | -1225.961769               |
| AMP-ALA-<br>DFO | -1336.919433       | 0.4605266 | 0.006991568         | -1336.522433                      | -1336.42906                |



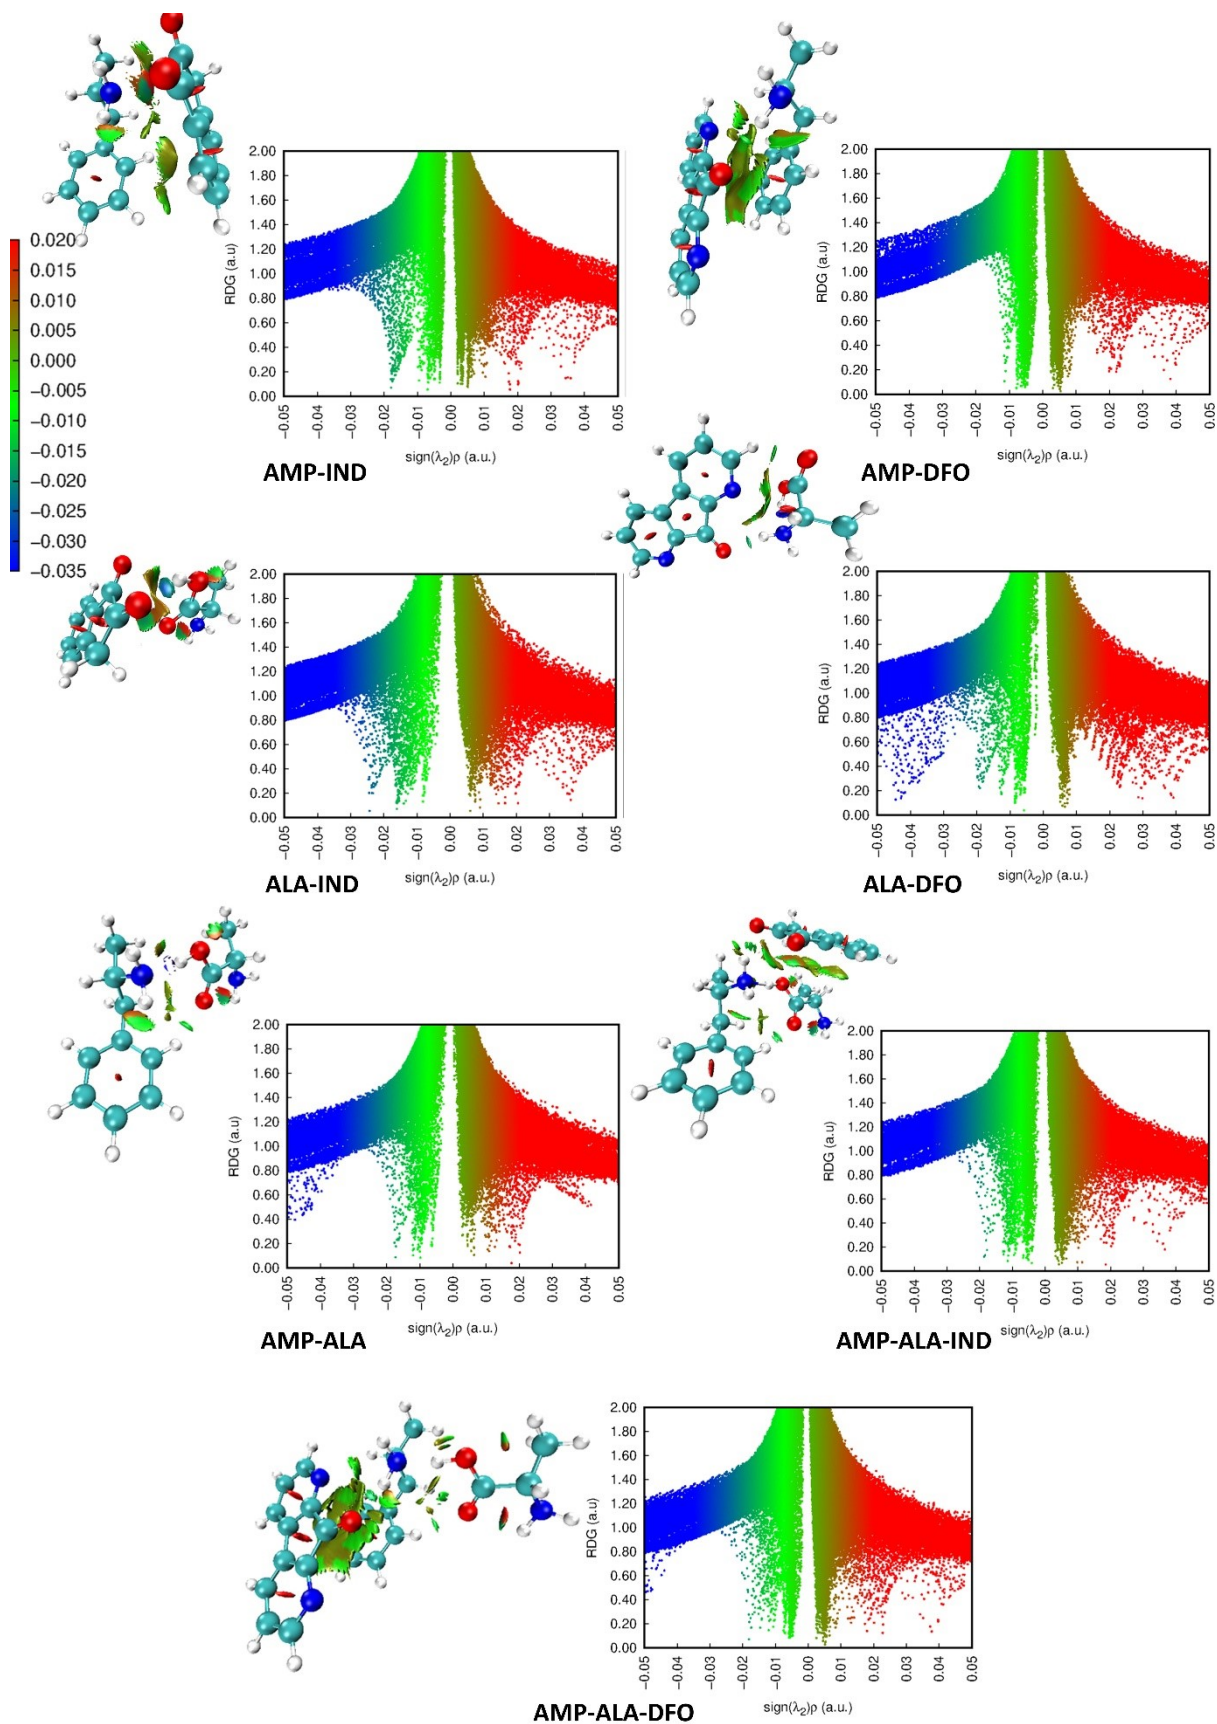

**Fig. S9** 2D and 3D plots of the binding structures. The NCI isosurfaces correspond to an isovalue of  $s = 0.5$  a.u.

We performed NCI analysis of the binding structures and the 2D and 3D NCI plots are displayed in **Fig. S9**. In the plot for AMP-IND, a blue patch between the NH<sub>2</sub> of AMP and the O of IND shows attractive interaction which spreads over a broad intermolecular space from a value of  $\text{sign}(\lambda^2)\rho$  of  $-0.05$  to  $-0.02$  a.u. A trough at approximately  $\text{sign}(\lambda^2)\rho = -0.02$  a.u. shows the hydrogen bond H $\cdots$ O interaction as depicted by a blue isosurface. Stronger hydrogen bond interactions are depicted as darker blue in the isosurfaces, that is,  $(\lambda^2)\rho$  of  $-0.05$  to  $-0.025$  a.u. These interactions are present in ALA-DFO, AMP-ALA and AMP-ALA-DFO. The green isosurfaces ( $-0.015 > \text{sign}(\lambda^2)\rho > 0.005$ ) represent van der Waals interactions between the molecules. In the  $0 > \text{sign}(\lambda^2)\rho > 0.01$  region, the repulsive interactions are depicted by brown isosurfaces. Finally, the aromatic rings region of AMP, IND and DFO cause steric repulsions shown by the red region at  $\text{sign}(\lambda^2)\rho = 0.010$  to  $0.020$  a.u. Similar isosurfaces were observed in all the other binding structures.

**Table S3** Values of SAPT components and TSAPT0 [kcal mol<sup>-1</sup>]

| <b>Structure</b> | <i>EI</i> | <i>Ex</i> | <i>I</i> | <i>D</i> | <i>T<sub>SAPT0</sub></i> |
|------------------|-----------|-----------|----------|----------|--------------------------|
| AMP-IND          | -16.42    | 23.21     | -4.23    | -13.46   | -10.91                   |
| AMP-DFO          | -9.62     | 17.33     | -2.49    | -16.69   | -11.47                   |
| ALA-IND          | -18.55    | 18.71     | -5.78    | -7.45    | -13.07                   |
| ALA-DFO          | -15.45    | 12.65     | -4.15    | -6.67    | -13.63                   |
| AMP-ALA          | -30.26    | 35.87     | -13.92   | -8.30    | -16.61                   |
| AMP-ALA-IND      | -15.48    | 18.89     | -3.53    | -13.77   | -13.90                   |
| AMP-ALA-DFO      | -11.85    | 18.69     | -2.93    | -17.19   | -13.29                   |

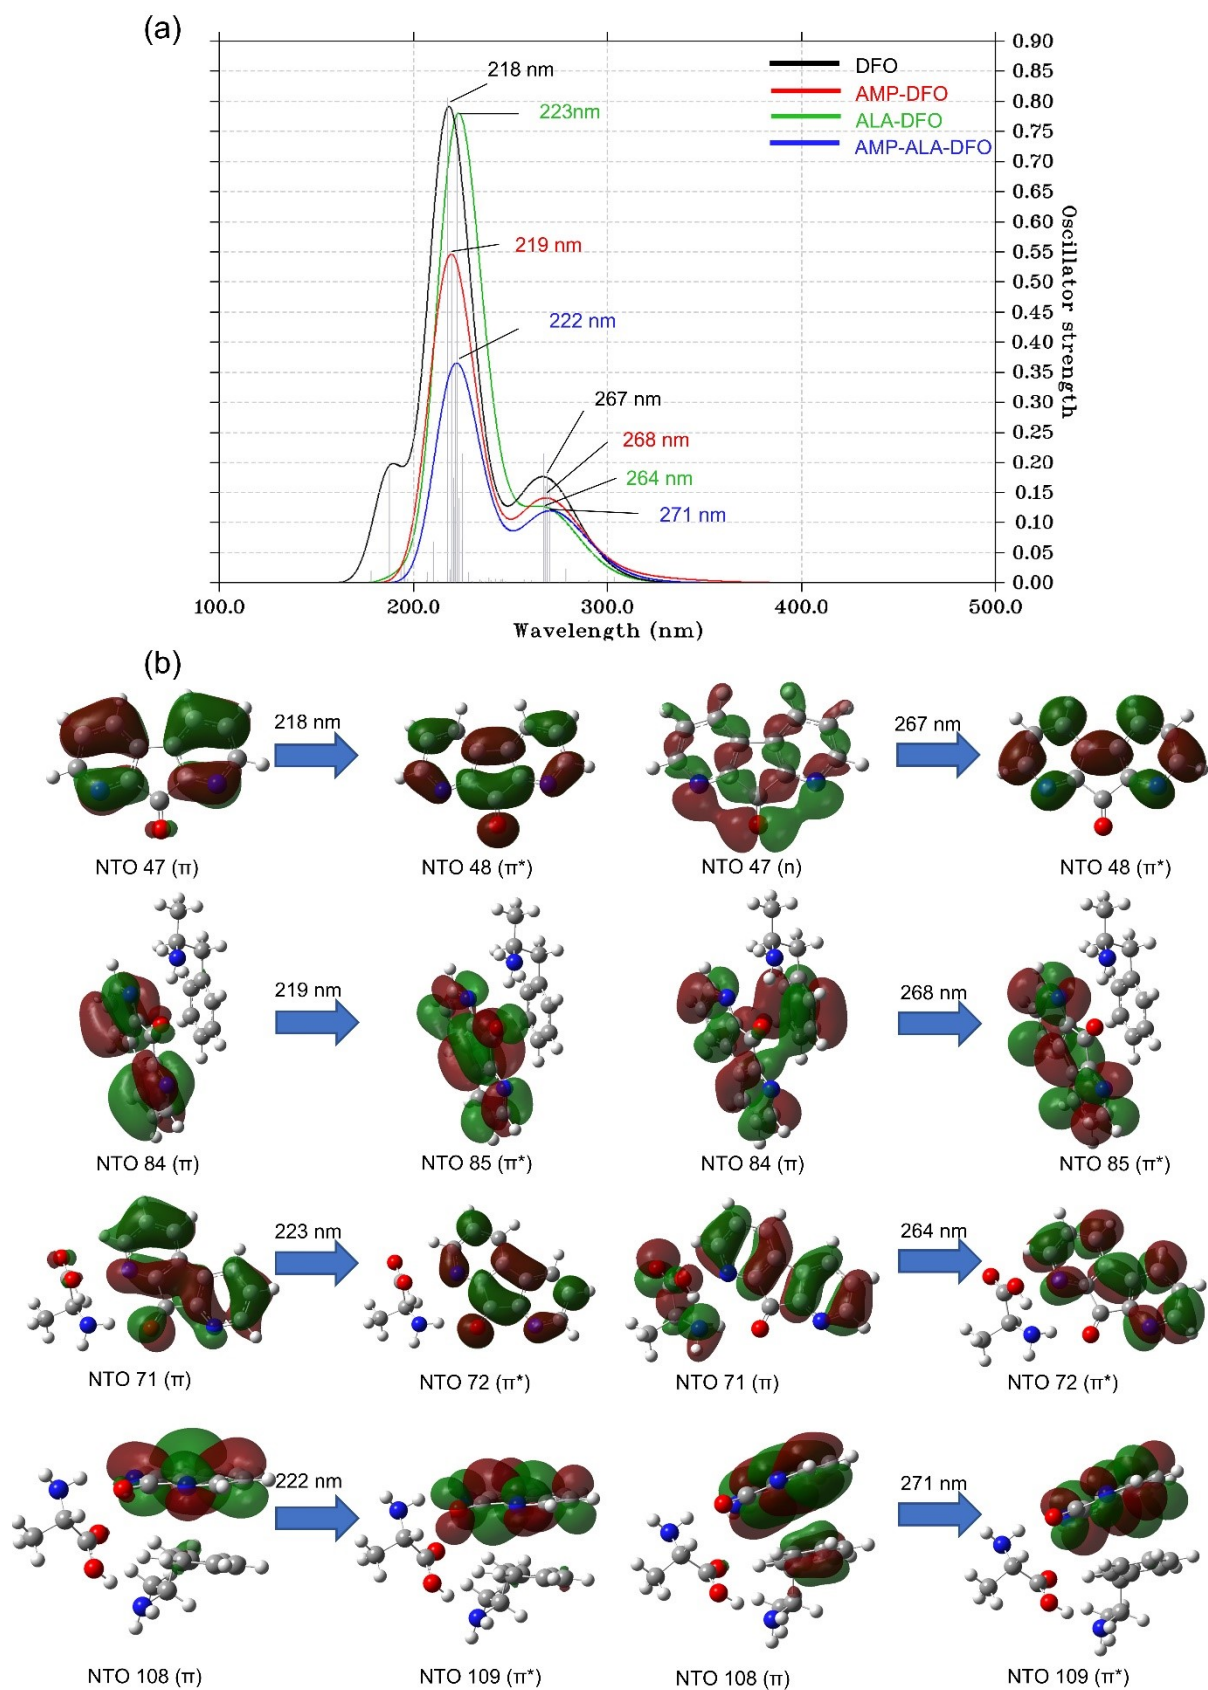

**Fig. S10 (a)** Computed UV-Vis spectra of DFO, AMP-DFO, ALA-DFO and AMP-ALA-DFO using the TD-DFT/ CAM-B3LYP/6-31+G(d,p) method. **(b)** The dominant natural transition orbital (NTO) pairs at the corresponding calculated  $\lambda_{\text{max}}$ .

**Table S4** Computed absorption wavelengths ( $\lambda_{\max}$ ), oscillator strengths ( $f$ ), excitation energies ( $E_x$ ), major molecular orbital (MO) assignments of the structures under study in the gas phase at the TD-DFT/CAM-B3LYP/6-31+G(d,p) level of theory

| Structures  | State | $\lambda_{\max}$<br>/nm | $f$  | $E_x$<br>/eV | Major MO assignments                                                                         |
|-------------|-------|-------------------------|------|--------------|----------------------------------------------------------------------------------------------|
| IND         | S4    | 172                     | 0.19 | 4.84         | H-2 $\rightarrow$ L (91.4%)                                                                  |
|             | S11   | 259                     | 0.43 | 7.05         | H-1 $\rightarrow$ L+2 (53.2%),<br>H-2 $\rightarrow$ L+1 (33.2%)                              |
| AMP-IND     | S5    | 187                     | 0.14 | 5.04         | H-5 $\rightarrow$ L (65.1%), H-2 $\rightarrow$ L (17.8%), H-4<br>$\rightarrow$ L (7.6%)      |
|             | S20   | 249                     | 0.15 | 6.75         | H-2 $\rightarrow$ L+1 (35.3%),<br>H-2 $\rightarrow$ L+3 (8.2%)                               |
| ALA-IND     | S4    | 176                     | 0.19 | 4.77         | H-3 $\rightarrow$ L (91.0%)                                                                  |
|             | S20   | 261                     | 0.22 | 7.17         | H-3 $\rightarrow$ L+2 (70.2%),<br>H-2 $\rightarrow$ L+1 (10.6%)                              |
| AMP-ALA-IND | S6    | 199                     | 0.14 | 4.79         | H-6 $\rightarrow$ L (69.9%), H $\rightarrow$ L (9.5%),<br>H-7 $\rightarrow$ L (8.4%)         |
|             | S19   | 262                     | 0.14 | 6.30         | H-5 $\rightarrow$ L+1 (79.7%),<br>H-6 $\rightarrow$ L+2 (7.6%)                               |
| DFO         | S5    | 187                     | 0.21 | 4.64         | H $\rightarrow$ L+1 (79.9%), H-5 $\rightarrow$ L (14.7%)                                     |
|             | S10   | 218                     | 0.81 | 5.70         | H-5 $\rightarrow$ L (78.0%), H $\rightarrow$ L+1 (16.9%)                                     |
|             | S16   | 267                     | 0.19 | 6.62         | H-3 $\rightarrow$ L+1 (48.3%),<br>H $\rightarrow$ L+5 (25.3%), H $\rightarrow$ L+2 (13.2%)   |
| AMP-DFO     | S8    | 219                     | 0.18 | 4.61         | H-3 $\rightarrow$ L+1 (55.8%),<br>H-2 $\rightarrow$ L+1 (21.1%), H-8 $\rightarrow$ L (12.8%) |
|             | S17   | 268                     | 0.55 | 5.65         | H-8 $\rightarrow$ L (70.7%), H-3 $\rightarrow$ L+1 (12.7%), H-<br>6 $\rightarrow$ L (5.7%)   |
| ALA-DFO     | S6    | 223                     | 0.16 | 4.63         | H-1 $\rightarrow$ L+1 (42.4%),<br>H $\rightarrow$ L+1 (32.5%), H-7 $\rightarrow$ L (17.9%)   |
|             | S12   | 264                     | 0.78 | 5.58         | H-7 $\rightarrow$ L (66.5%), H $\rightarrow$ L+1 (14.9%), H-6<br>$\rightarrow$ L (7.0%)      |
| AMP-ALA-DFO | S8    | 222                     | 0.16 | 4.59         | H-1 $\rightarrow$ L+1 (56.7%),<br>H-2 $\rightarrow$ L+1 (19.1%), H-10 $\rightarrow$ L (8.2%) |
|             | S17   | 271                     | 0.37 | 5.59         | H-10 $\rightarrow$ L (39.1%),<br>H-2 $\rightarrow$ L+1 (14.8%), H-8 $\rightarrow$ L (11.2%)  |

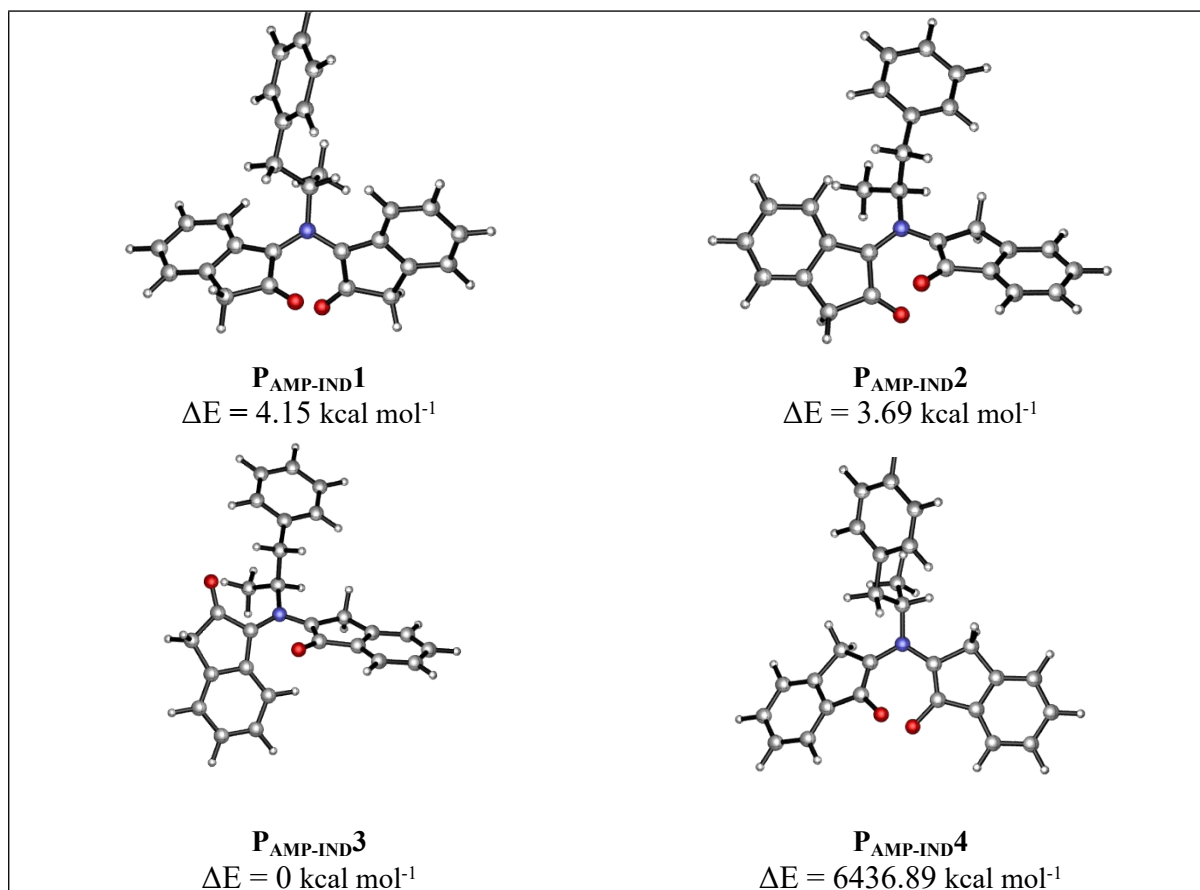

**Fig. S11** Optimised geometries and relative stabilities of reaction products between AMP and IND

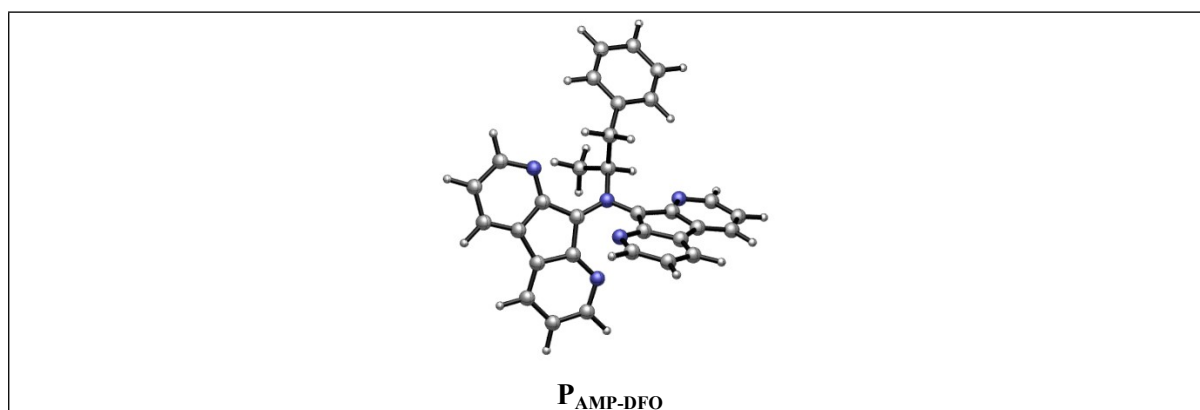

**Fig. S12** Optimised geometry of reaction product between AMP and DFO

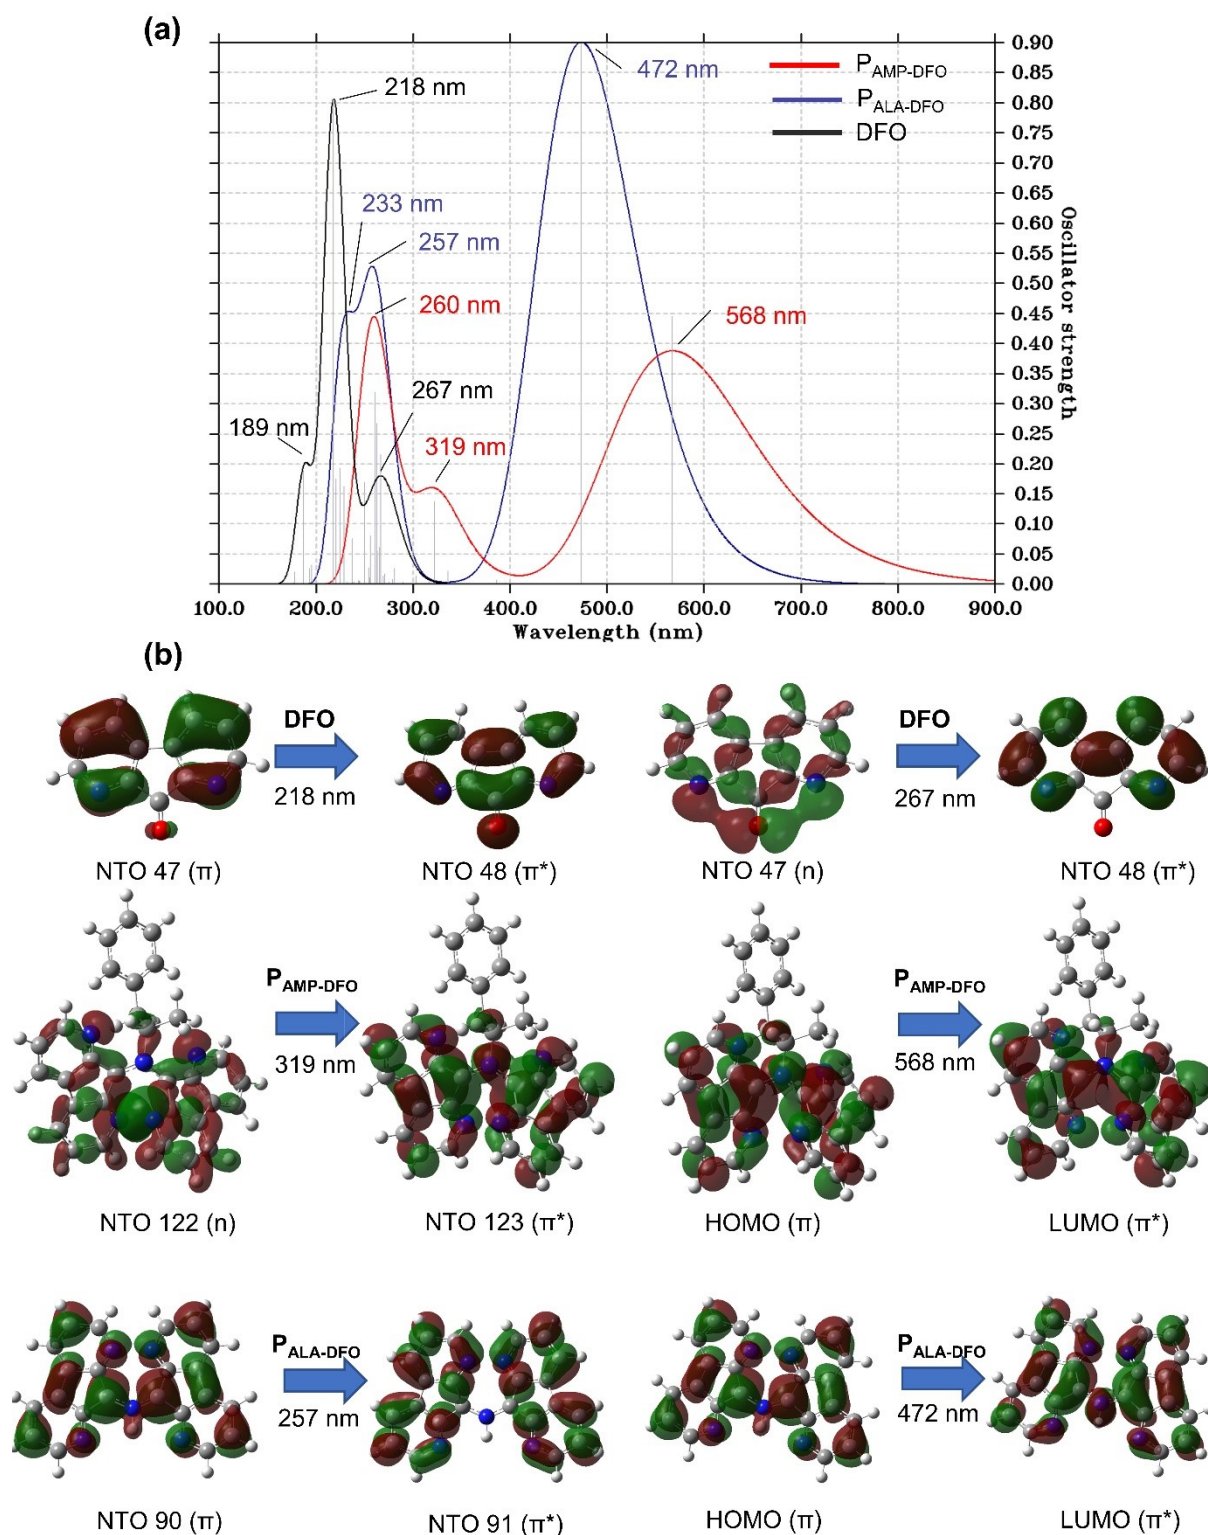

**Table S5** Computed absorption wavelengths ( $\lambda_{\max}$ ), oscillator strengths ( $f$ ), excitation energies ( $E_x$ ), major molecular orbital (MO) assignments of the structures under study in the gas phase at the TD-DFT/CAM-B3LYP/6-31+G(d,p) level of theory

| Structures            | State | $\lambda_{\max}$<br>/nm | $f$  | $E_x$<br>/eV | Major MO assignments                                                                                                         |
|-----------------------|-------|-------------------------|------|--------------|------------------------------------------------------------------------------------------------------------------------------|
| IND                   | S4    | 172                     | 0.19 | 4.84         | H-2 $\rightarrow$ L (91.4%)                                                                                                  |
|                       | S11   | 259                     | 0.43 | 7.05         | H-1 $\rightarrow$ L+2 (53.2%),<br>H-2 $\rightarrow$ L+1 (33.2%)                                                              |
| P <sub>AMP</sub> -IND | S1    | 511                     | 0.31 | 2.41         | H $\rightarrow$ L (94.7%)                                                                                                    |
|                       | S11   | 253                     | 0.20 | 5.09         | H $\rightarrow$ L+6 (76.7%)                                                                                                  |
| P <sub>ALA</sub> -IND | S1    | 469                     | 0.58 | 2.64         | H $\rightarrow$ L (101.7%)                                                                                                   |
|                       | S9    | 251                     | 0.35 | 4.97         | H $\rightarrow$ L+3 (52.9%), H-4 $\rightarrow$ L (25.9%), H-1<br>$\rightarrow$ L (9.9%)                                      |
|                       | S18   | 188                     | 0.18 | 6.67         | H-3 $\rightarrow$ L+1 (17.0%), H-7 $\rightarrow$ L (15.6%), H-<br>4 $\rightarrow$ L+2 (13.1%)                                |
| DFO                   | S5    | 187                     | 0.21 | 4.64         | H $\rightarrow$ L+1 (79.9%), H-5 $\rightarrow$ L (14.7%)                                                                     |
|                       | S10   | 218                     | 0.81 | 5.70         | H-5 $\rightarrow$ L (78.0%), H $\rightarrow$ L+1 (16.9%)                                                                     |
|                       | S16   | 267                     | 0.19 | 6.62         | H-3 $\rightarrow$ L+1 (48.3%),<br>H $\rightarrow$ L+5 (25.3%), H $\rightarrow$ L+2 (13.2%)                                   |
| P <sub>AMP</sub> -DFO | S1    | 568                     | 0.45 | 2.18         | H $\rightarrow$ L (98.1%)                                                                                                    |
|                       | S6    | 319                     | 0.14 | 3.84         | H-5 $\rightarrow$ L (87.5%)                                                                                                  |
|                       | S14   | 260                     | 0.27 | 4.71         | H-2 $\rightarrow$ L+1 (21.0%),<br>H $\rightarrow$ L+3 (18.2%), H-11 $\rightarrow$ L (15.9%)                                  |
| P <sub>ALA</sub> -DFO | S1    | 472                     | 0.90 | 2.58         | H $\rightarrow$ L (101.0%)                                                                                                   |
|                       | S12   | 257                     | 0.29 | 4.74         | H $\rightarrow$ L+3 (22.9%), H-8 $\rightarrow$ L (21.0%), H-2<br>$\rightarrow$ L+1 (20.2%),<br>H-1 $\rightarrow$ L+2 (17.8%) |
|                       | S20   | 233                     | 0.32 | 5.50         | H-8 $\rightarrow$ L (45.2%)                                                                                                  |

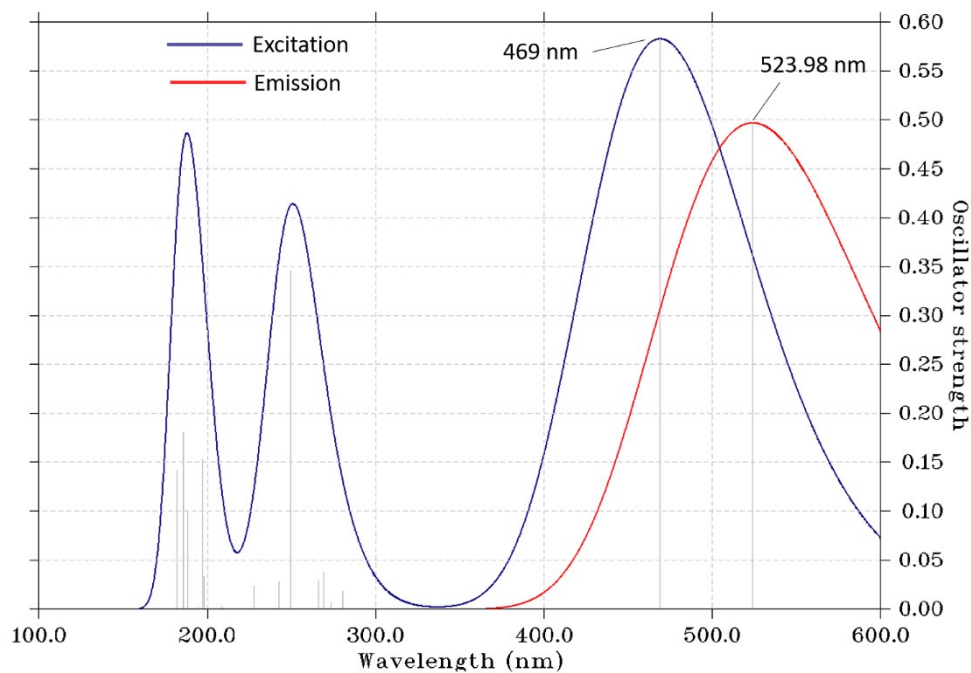

**Fig. S14** Excitation and fluorescence spectra for P<sub>ALA-IND</sub>

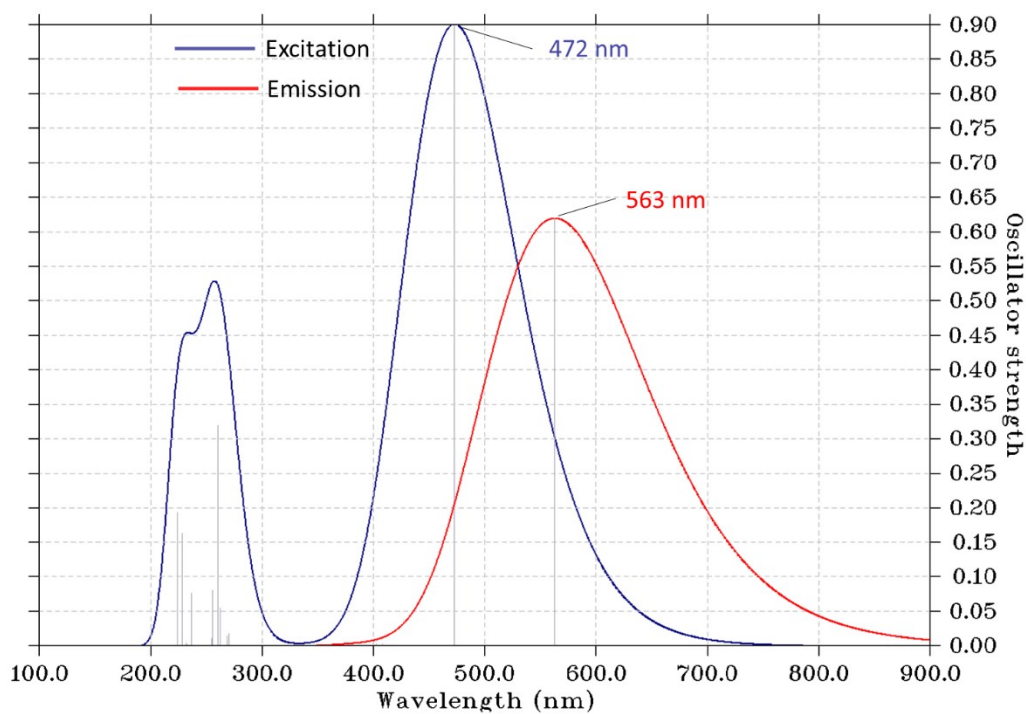

**Fig. S15** Excitation and fluorescence spectra for P<sub>ALA-DFO</sub>

The first singlet excited states ( $S_1$ ) of P<sub>ALA-IND</sub> and P<sub>ALA-DFO</sub> were analysed using TD-DFT method. We optimised the ground state structures using the TD-CAM-B3LYP method with the 6-31G(d) basis set.<sup>1</sup> Subsequently, the fluorescence spectra were simulated using the Multiwfn program<sup>2</sup> as shown in Fig. S14 and Fig. S15.



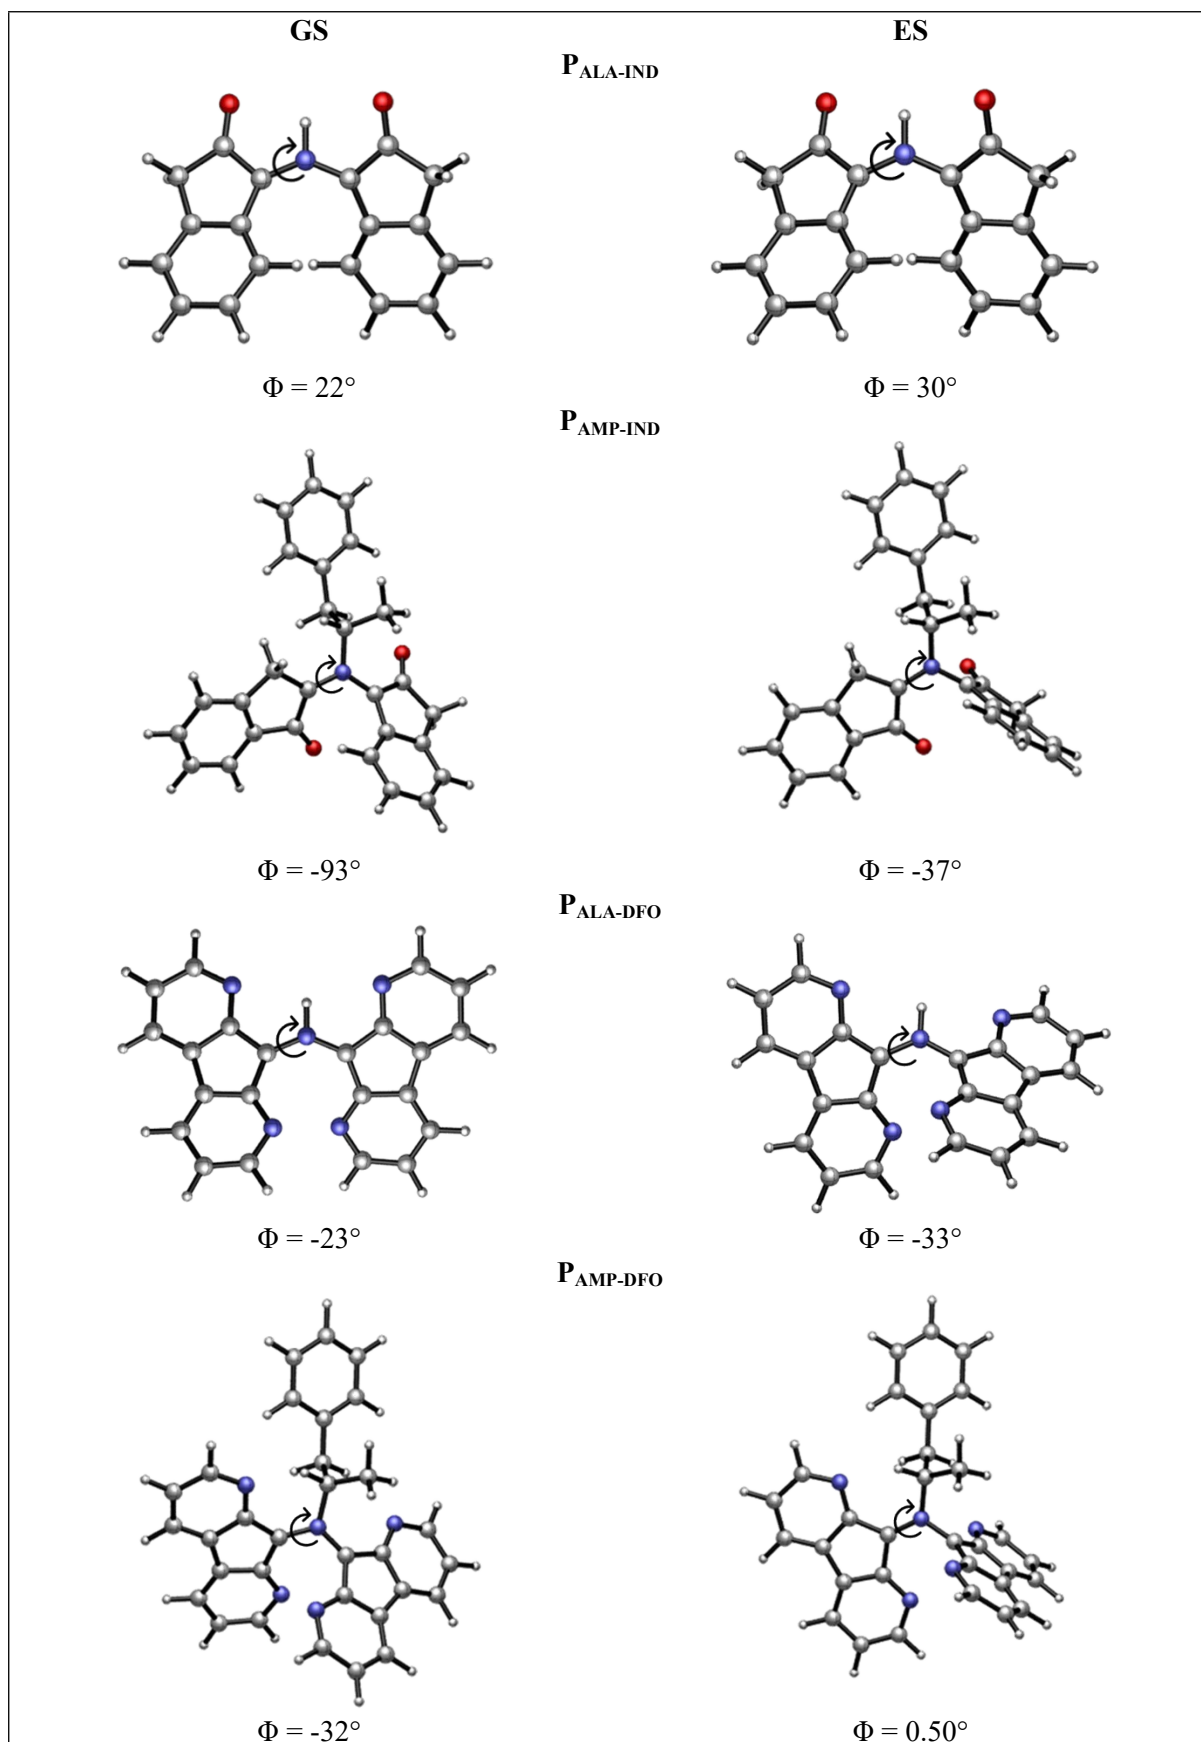

**Fig. S16** Ground state (GS) and excited state (ES) geometries of P<sub>ALA-IND</sub>, P<sub>ALA-DFO</sub>, P<sub>AMP-IND</sub> and P<sub>AMP-DFO</sub>

## Coordinates of optimised geometries of AMP, ALA, IND and DFO

### AMP

|   |              |              |              |
|---|--------------|--------------|--------------|
| C | -3.050543000 | 0.100683000  | -0.323148000 |
| C | -2.416029000 | -1.135007000 | -0.468352000 |
| C | -1.087973000 | -1.290613000 | -0.071420000 |
| C | -0.368957000 | -0.219866000 | 0.478541000  |
| C | -1.017785000 | 1.015278000  | 0.618388000  |
| C | -2.346593000 | 1.175890000  | 0.221140000  |
| H | -4.085607000 | 0.222789000  | -0.628676000 |
| H | -2.957258000 | -1.978722000 | -0.887364000 |
| H | -0.599784000 | -2.255821000 | -0.184497000 |
| H | -0.469944000 | 1.854391000  | 1.038491000  |
| H | -2.832249000 | 2.140366000  | 0.340438000  |
| C | 1.085950000  | -0.382071000 | 0.856440000  |
| C | 2.047383000  | -0.165598000 | -0.333136000 |
| H | 1.355408000  | 0.333365000  | 1.641672000  |
| N | 1.914301000  | 1.215635000  | -0.813635000 |
| H | 2.530494000  | 1.360565000  | -1.610475000 |
| H | 0.966986000  | 1.370472000  | -1.152051000 |
| H | 1.254515000  | -1.389392000 | 1.255451000  |
| C | 3.497395000  | -0.407918000 | 0.088962000  |
| H | 3.631925000  | -1.426683000 | 0.466608000  |
| H | 4.180885000  | -0.271886000 | -0.757024000 |
| H | 3.785618000  | 0.300274000  | 0.872429000  |
| H | 1.781811000  | -0.913831000 | -1.104052000 |

### ALA

|   |             |              |              |
|---|-------------|--------------|--------------|
| C | 0.680495000 | 0.022524000  | 0.365487000  |
| N | 1.387082000 | -1.169037000 | -0.092978000 |
| H | 2.267378000 | -1.262904000 | 0.404188000  |
| H | 0.826018000 | -1.995220000 | 0.095961000  |

|   |              |              |              |
|---|--------------|--------------|--------------|
| C | -0.797817000 | -0.138580000 | 0.033212000  |
| O | -1.340798000 | -1.190053000 | -0.228180000 |
| O | -1.474784000 | 1.030070000  | 0.122833000  |
| H | -2.405795000 | 0.818315000  | -0.059347000 |
| C | 1.295076000  | 1.281410000  | -0.259663000 |
| H | 2.350977000  | 1.350393000  | 0.019814000  |
| H | 1.237292000  | 1.223173000  | -1.349608000 |
| H | 0.784376000  | 2.184067000  | 0.082001000  |
| H | 0.688305000  | 0.153175000  | 1.466394000  |

### **IND**

|   |              |              |              |
|---|--------------|--------------|--------------|
| C | -1.693257000 | -1.411686000 | 0.000163000  |
| C | -0.411292000 | -0.866757000 | 0.000164000  |
| C | -0.251832000 | 0.529497000  | -0.000006000 |
| C | -1.349788000 | 1.395115000  | -0.000178000 |
| C | -2.627224000 | 0.845027000  | -0.000169000 |
| C | -2.792951000 | -0.549418000 | -0.000001000 |
| H | -1.838999000 | -2.488055000 | 0.000284000  |
| H | -1.185218000 | 2.468175000  | -0.000309000 |
| H | -3.500621000 | 1.489724000  | -0.000295000 |
| H | -3.796236000 | -0.965683000 | -0.000005000 |
| C | 1.175279000  | 0.891789000  | -0.000008000 |
| C | 0.916183000  | -1.592416000 | 0.000316000  |
| O | 1.687888000  | 1.992385000  | -0.000203000 |
| C | 1.951296000  | -0.462325000 | 0.000136000  |
| O | 3.152617000  | -0.573244000 | 0.000049000  |
| H | 1.058445000  | -2.230091000 | 0.880898000  |
| H | 1.058483000  | -2.230464000 | -0.879984000 |

### **DFO**

|   |             |              |              |
|---|-------------|--------------|--------------|
| C | 3.366097000 | 0.021054000  | -0.000003000 |
| C | 3.025240000 | -1.336748000 | -0.000011000 |

|   |              |              |              |
|---|--------------|--------------|--------------|
| C | 1.678546000  | -1.714431000 | -0.000006000 |
| C | 0.737606000  | -0.691142000 | 0.000009000  |
| C | 1.194659000  | 0.642136000  | 0.000017000  |
| N | 2.467348000  | 1.020485000  | 0.000011000  |
| H | 1.388205000  | -2.761023000 | -0.000016000 |
| H | 4.412040000  | 0.318758000  | -0.000008000 |
| H | 3.809921000  | -2.086457000 | -0.000023000 |
| C | -1.194659000 | 0.642136000  | 0.000017000  |
| C | -0.737606000 | -0.691142000 | 0.000009000  |
| C | -1.678546000 | -1.714431000 | -0.000006000 |
| C | -3.025240000 | -1.336748000 | -0.000011000 |
| C | -3.366097000 | 0.021054000  | -0.000003000 |
| N | -2.467348000 | 1.020485000  | 0.000011000  |
| H | -1.388205000 | -2.761023000 | -0.000016000 |
| H | -3.809921000 | -2.086457000 | -0.000023000 |
| H | -4.412040000 | 0.318758000  | -0.000008000 |
| C | 0.000000000  | 1.574673000  | 0.000048000  |
| O | 0.000000000  | 2.784023000  | -0.000051000 |

### References:

- 1 L. M. Hunnisett, P. F. Kelly, S. Bleay, F. Plasser, R. King, B. McMurchie and P. Goddard, *J. Chem. Phys.*, 2021, **154**, 1–5.
- 2 T. Lu and F. Chen, *J. Comput. Chem.*, 2012, **33**, 580–592.
